# Supplementary material
Source: PubMed Central journal article supplement (PMC3611241)
Supplement: NIHMS421814-supplement-01.pdf [file NIHMS421814-supplement-01.pdf]

**Supplementary Table 1.** Tumor Suppressor Genes That Are Frequent Targets of Hypermethylation in CRC

| Gene                                  | Methylation frequency (%) in CRC | Function                          |
|---------------------------------------|----------------------------------|-----------------------------------|
| <i>ALX4</i>                           | 60–70                            | Homeobox gene                     |
| <i>APC</i>                            | 10–30                            | Wnt signaling                     |
| <i>AXIN2</i>                          | 5–10                             | Wnt signaling                     |
| <i>BMP3</i>                           | 70                               | Bone and cartilage formation      |
| <i>BNIP3</i>                          | 65–70                            | Apoptosis                         |
| <i>CACNA1G<sup>a</sup></i>            | 20–35                            | calcium metabolism                |
| <i>CDH1</i>                           | 30–55                            | Cell adhesion                     |
| <i>CDH13</i>                          | 50–60                            | Cell adhesion                     |
| <i>CDKN2A<sup>INK4a</sup> (p14)</i>   | 10–30                            | Cell cycle                        |
| <i>CDKN2A<sup>A-INK4b</sup> (p15)</i> | 30–65                            | Cell cycle                        |
| <i>CDKN2A<sup>ARF</sup> (p16)</i>     | 20–30                            | Cell cycle                        |
| <i>CDX1</i>                           | 100                              | Homeobox gene                     |
| <i>CHFR</i>                           | 63                               | Cell cycle                        |
| <i>DAPK1</i>                          | 40–50                            | Apoptosis                         |
| <i>DCC</i>                            | 50–60                            | Axonal guidance                   |
| <i>DKK1</i>                           | 10–15                            | Wnt signaling                     |
| <i>EGFR</i>                           | 40–50                            | Cytokine signaling                |
| <i>EYA2</i>                           | 60–70                            | Development                       |
| <i>EYA4</i>                           | 81                               | Development                       |
| <i>GATA4</i>                          | 70                               | Transcription factor              |
| <i>GATA5</i>                          | 79                               | Transcription factor              |
| <i>HIC1</i>                           | 50–80                            | Transcriptional repressor         |
| <i>HLTF</i>                           | 30–50                            | Transcription factor              |
| <i>HPP1</i>                           | 60–80                            | Hyperplastic polyposis            |
| <i>IGF2<sup>a</sup></i>               | 100                              | Cell growth                       |
| <i>IGFBP3</i>                         | 29                               | Hormonal signaling                |
| <i>KLF4</i>                           | 25                               | Transcription factor              |
| <i>MGMT</i>                           | 30–60                            | DNA repair                        |
| <i>MLH1</i>                           | 10–20                            | Mismatch repair                   |
| <i>MMP2</i>                           | 60–70                            | Protease                          |
| <i>MYOD1</i>                          | >90                              | Transcription factor              |
| <i>NDRG4</i>                          | 70–85                            | Putative tumor suppressor gene    |
| <i>NEUROG1<sup>a</sup></i>            | 20–65                            | Putative tumor suppressor gene    |
| <i>RAR<math>\beta</math>2</i>         | 10–40                            | MAPK signaling                    |
| <i>RASSF1A</i>                        | 30–55                            | RAS signaling                     |
| <i>RASSF2A</i>                        | 70                               | RAS signaling                     |
| <i>RUNX3<sup>a</sup></i>              | 20–35                            | Transcription factor              |
| <i>SFRP1</i>                          | 82                               | Wnt signaling                     |
| <i>SFRP2</i>                          | 60–90                            | Wnt signaling                     |
| <i>SOCS1<sup>a</sup></i>              | 20–30                            | Cytokine signaling                |
| <i>TFAP2E</i>                         | 51                               | Transcription factor              |
| <i>TIMP3</i>                          | 20–30                            | ECM component                     |
| <i>TWIST1</i>                         | 63                               | Transcription factor              |
| <i>UNC5C</i>                          | 70–80                            | Axonal guidance                   |
| <i>Vimentin</i>                       | 50–80                            | Epithelial–mesenchymal transition |
| <i>WNT5a</i>                          | 48                               | Wnt signaling                     |

<sup>a</sup>CIMP marker as proposed by Weisenberger et al, 2006.
